# Supplementary material for: Muskelin regulates actin-dependent synaptic changes and intrinsic brain activity relevant to behavioral and cognitive processes
Source: PubMed Central journal article supplement (PMC9200775; doi:10.1038/s42003-022-03446-1), 2022-06-15
Supplement: 42003_2022_3446_MOESM2_ESM.pdf [file 42003_2022_3446_MOESM2_ESM.pdf]

## Description of Additional Supplementary Files

**File name:** Supplementary Data 1

**Description:** Data file related to Fig 1.

**File name:** Supplementary Data 2

**Description:** Data file related to Figs S1 and S2.

**File name:** Supplementary Data 3

**Description:** Data file related to Fig 2 and S3a.

**File name:** Supplementary Data 4

**Description:** Data file related to Fig 3.

**File name:** Supplementary Data 5

**Description:** Data related to Fig.4a-f and S3b-d.

**File name:** Supplementary Data 6

**Description:** Data file related to Fig 5 and S4a-d.

**File name:** Supplementary Data 7

**Description:** Data file related to Fig 6 and S4e-g.
